# Supplementary material for: One-Dimensional Mercury Halide Coordination Polymers Based on A Semi-Rigid N-Donor Ligand: Reversible Structural Transformation
Source: MDPI journal article supplement (doi:10.3390/polym11030436), 2019-03-06

# checkCIF/PLATON report

Structure factors have been supplied for datablock(s) 1, 2, 3, 4

THIS REPORT IS FOR GUIDANCE ONLY. IF USED AS PART OF A REVIEW PROCEDURE FOR PUBLICATION, IT SHOULD NOT REPLACE THE EXPERTISE OF AN EXPERIENCED CRYSTALLOGRAPHIC REFEREE.

No syntax errors found.      CIF dictionary      Interpreting this report

## Datablock: 1

---

|                 |                                                 |                      |
|-----------------|-------------------------------------------------|----------------------|
| Bond precision: | C-C = 0.0066 Å                                  | Wavelength=0.71073   |
| Cell:           | a=5.0705(1)      b=20.6636(5)      c=11.4320(3) |                      |
|                 | alpha=90      beta=92.3088(18)      gamma=90    |                      |
| Temperature:    | 296 K                                           |                      |
|                 | Calculated                                      | Reported             |
| Volume          | 1196.81(5)                                      | 1196.81(5)           |
| Space group     | P 21/m                                          | P 21/m               |
| Hall group      | -P 2yb                                          | -P 2yb               |
| Moiety formula  | C20 H18 Cl2 Hg N4 O2, C H4 O                    | ?                    |
| Sum formula     | C21 H22 Cl2 Hg N4 O3                            | C21 H22 Cl2 Hg N4 O3 |
| Mr              | 649.92                                          | 649.91               |
| Dx,g cm-3       | 1.804                                           | 1.803                |
| Z               | 2                                               | 2                    |
| Mu (mm-1)       | 6.682                                           | 6.682                |
| F000            | 628.0                                           | 628.0                |
| F000'           | 624.19                                          |                      |
| h,k,lmax        | 6,27,15                                         | 6,27,15              |
| Nref            | 3077                                            | 3057                 |
| Tmin,Tmax       | 0.453,0.716                                     | 0.480,0.746          |
| Tmin'           | 0.133                                           |                      |

Correction method= # Reported T Limits: Tmin=0.480 Tmax=0.746  
AbsCorr = MULTI\_SCAN

Data completeness= 0.994      Theta(max)= 28.369

R(reflections)= 0.0364( 2395)      wR2(reflections)= 0.0783( 3057)

S = 1.009      Npar= 143

---

The following ALERTS were generated. Each ALERT has the format

**test-name\_ALERT\_alert-type\_alert-level.**

Click on the hyperlinks for more details of the test.

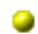

### Alert level C

|                   |                                                |    |        |
|-------------------|------------------------------------------------|----|--------|
| PLAT202_ALERT_3_C | Isotropic non-H Atoms in Anion/Solvent .....   | 1  | Check  |
| PLAT241_ALERT_2_C | High 'MainMol' Ueq as Compared to Neighbors of | C7 | Check  |
| PLAT242_ALERT_2_C | Low 'MainMol' Ueq as Compared to Neighbors of  | C6 | Check  |
| PLAT911_ALERT_3_C | Missing FCF Refl Between Thmin & STh/L= 0.600  | 5  | Report |

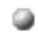

### Alert level G

|                   |                                                  |      |        |
|-------------------|--------------------------------------------------|------|--------|
| PLAT002_ALERT_2_G | Number of Distance or Angle Restraints on AtSite | 2    | Note   |
| PLAT004_ALERT_5_G | Polymeric Structure Found with Maximum Dimension | 1    | Info   |
| PLAT007_ALERT_5_G | Number of Unrefined Donor-H Atoms .....          | 3    | Report |
| PLAT172_ALERT_4_G | The CIF-Embedded .res File Contains DFIX Records | 1    | Report |
| PLAT300_ALERT_4_G | Atom Site Occupancy of O2 Constrained at         | 0.5  | Check  |
| PLAT300_ALERT_4_G | Atom Site Occupancy of H11A Constrained at       | 0.5  | Check  |
| PLAT300_ALERT_4_G | Atom Site Occupancy of H11B Constrained at       | 0.5  | Check  |
| PLAT300_ALERT_4_G | Atom Site Occupancy of H2C Constrained at        | 0.25 | Check  |
| PLAT300_ALERT_4_G | Atom Site Occupancy of H2D Constrained at        | 0.25 | Check  |
| PLAT302_ALERT_4_G | Anion/Solvent/Minor-Residue Disorder (Resd 2 )   | 50%  | Note   |
| PLAT764_ALERT_4_G | Overcomplete CIF Bond List Detected (Rep/Expd) . | 1.16 | Ratio  |
| PLAT860_ALERT_3_G | Number of Least-Squares Restraints .....         | 1    | Note   |
| PLAT910_ALERT_3_G | Missing # of FCF Reflection(s) Below Theta(Min). | 2    | Note   |
| PLAT912_ALERT_4_G | Missing # of FCF Reflections Above STh/L= 0.600  | 14   | Note   |
| PLAT933_ALERT_2_G | Number of OMIT Records in Embedded .res File ... | 4    | Note   |
| PLAT978_ALERT_2_G | Number C-C Bonds with Positive Residual Density. | 1    | Info   |

0 **ALERT level A** = Most likely a serious problem - resolve or explain  
0 **ALERT level B** = A potentially serious problem, consider carefully  
4 **ALERT level C** = Check. Ensure it is not caused by an omission or oversight  
16 **ALERT level G** = General information/check it is not something unexpected

0 ALERT type 1 CIF construction/syntax error, inconsistent or missing data  
5 ALERT type 2 Indicator that the structure model may be wrong or deficient  
4 ALERT type 3 Indicator that the structure quality may be low  
9 ALERT type 4 Improvement, methodology, query or suggestion  
2 ALERT type 5 Informative message, check

## Datablock: 2

Bond precision: C-C = 0.0044 A

Wavelength=0.71073

Cell: a=9.3764(5) b=13.3232(7) c=17.1229(10)  
alpha=90 beta=97.490(2) gamma=90

Temperature: 299 K

|                | Calculated           | Reported             |
|----------------|----------------------|----------------------|
| Volume         | 2120.8(2)            | 2120.8(2)            |
| Space group    | P 21/c               | P 21/c               |
| Hall group     | -P 2ybc              | -P 2ybc              |
| Moiety formula | C20 H18 Cl2 Hg N4 O2 | ?                    |
| Sum formula    | C20 H18 Cl2 Hg N4 O2 | C20 H18 Cl2 Hg N4 O2 |
| Mr             | 617.87               | 617.87               |
| Dx,g cm-3      | 1.935                | 1.935                |
| Z              | 4                    | 4                    |
| Mu (mm-1)      | 7.533                | 7.533                |
| F000           | 1184.0               | 1184.0               |
| F000'          | 1176.38              |                      |
| h,k,lmax       | 12,17,22             | 12,17,22             |
| Nref           | 5284                 | 5275                 |
| Tmin,Tmax      | 0.179,0.471          | 0.547,0.746          |
| Tmin'          | 0.096                |                      |

Correction method= # Reported T Limits: Tmin=0.547 Tmax=0.746  
AbsCorr = MULTI\_SCAN

Data completeness= 0.998                      Theta(max)= 28.311

R(reflections)= 0.0255( 4223)              wR2(reflections)= 0.0524( 5275)

S = 1.032                                      Npar= 262

---

The following ALERTS were generated. Each ALERT has the format  
**test-name\_ALERT\_alert-type\_alert-level**.  
Click on the hyperlinks for more details of the test.

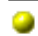

#### Alert level C

PLAT241\_ALERT\_2\_C High 'MainMol' Ueq as Compared to Neighbors of C14 Check

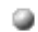

#### Alert level G

|                                                                    |          |
|--------------------------------------------------------------------|----------|
| PLAT004_ALERT_5_G Polymeric Structure Found with Maximum Dimension | 1 Info   |
| PLAT007_ALERT_5_G Number of Unrefined Donor-H Atoms .....          | 2 Report |
| PLAT232_ALERT_2_G Hirshfeld Test Diff (M-X) Hg --N1 .              | 5.0 s.u. |
| PLAT804_ALERT_5_G Number of ARU-Code Packing Problem(s) in PLATON  | 1 Info   |
| PLAT912_ALERT_4_G Missing # of FCF Reflections Above STh/L= 0.600  | 10 Note  |
| PLAT978_ALERT_2_G Number C-C Bonds with Positive Residual Density. | 1 Info   |

- 
- 0 **ALERT level A** = Most likely a serious problem - resolve or explain
  - 0 **ALERT level B** = A potentially serious problem, consider carefully
  - 1 **ALERT level C** = Check. Ensure it is not caused by an omission or oversight
  - 6 **ALERT level G** = General information/check it is not something unexpected
- 
- 0 ALERT type 1 CIF construction/syntax error, inconsistent or missing data

3 ALERT type 2 Indicator that the structure model may be wrong or deficient  
0 ALERT type 3 Indicator that the structure quality may be low  
1 ALERT type 4 Improvement, methodology, query or suggestion  
3 ALERT type 5 Informative message, check

---

## Datablock: 3

---

Bond precision: C-C = 0.0058 A Wavelength=0.71073

Cell: a=9.3217(1) b=13.4660(1) c=17.2458(2)  
alpha=90 beta=96.741(1) gamma=90

Temperature: 296 K

|                | Calculated           | Reported             |
|----------------|----------------------|----------------------|
| Volume         | 2149.83(4)           | 2149.83(4)           |
| Space group    | P 21/c               | P 21/c               |
| Hall group     | -P 2ybc              | -P 2ybc              |
| Moiety formula | C20 H18 Br2 Hg N4 O2 | ?                    |
| Sum formula    | C20 H18 Br2 Hg N4 O2 | C20 H18 Br2 Hg N4 O2 |
| Mr             | 706.77               | 706.79               |
| Dx,g cm-3      | 2.184                | 2.184                |
| Z              | 4                    | 4                    |
| Mu (mm-1)      | 10.900               | 10.900               |
| F000           | 1328.0               | 1328.0               |
| F000'          | 1317.41              |                      |
| h,k,lmax       | 12,17,22             | 12,17,22             |
| Nref           | 5339                 | 5335                 |
| Tmin,Tmax      | 0.281,0.336          | 0.513,0.746          |
| Tmin'          | 0.037                |                      |

Correction method= # Reported T Limits: Tmin=0.513 Tmax=0.746  
AbsCorr = MULTI\_SCAN

Data completeness= 0.999 Theta(max)= 28.298

R(reflections)= 0.0312( 3982) wR2(reflections)= 0.0608( 5335)

S = 1.023 Npar= 262

---

The following ALERTS were generated. Each ALERT has the format  
**test-name\_ALERT\_alert-type\_alert-level.**  
Click on the hyperlinks for more details of the test.

---

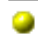

### Alert level C

PLAT241\_ALERT\_2\_C High 'MainMol' Ueq as Compared to Neighbors of C14 Check  
PLAT978\_ALERT\_2\_C Number C-C Bonds with Positive Residual Density. 0 Info

---

## ● Alert level G

|                   |                                                  |         |        |
|-------------------|--------------------------------------------------|---------|--------|
| PLAT004_ALERT_5_G | Polymeric Structure Found with Maximum Dimension | 1       | Info   |
| PLAT007_ALERT_5_G | Number of Unrefined Donor-H Atoms .....          | 2       | Report |
| PLAT142_ALERT_4_G | s.u. on b - Axis Small or Missing .....          | 0.00010 | Ang.   |
| PLAT232_ALERT_2_G | Hirshfeld Test Diff (M-X) Hg --Br1 .             | 8.0     | s.u.   |
| PLAT912_ALERT_4_G | Missing # of FCF Reflections Above STh/L= 0.600  | 5       | Note   |

---

0 **ALERT level A** = Most likely a serious problem - resolve or explain  
0 **ALERT level B** = A potentially serious problem, consider carefully  
2 **ALERT level C** = Check. Ensure it is not caused by an omission or oversight  
5 **ALERT level G** = General information/check it is not something unexpected

0 ALERT type 1 CIF construction/syntax error, inconsistent or missing data  
3 ALERT type 2 Indicator that the structure model may be wrong or deficient  
0 ALERT type 3 Indicator that the structure quality may be low  
2 ALERT type 4 Improvement, methodology, query or suggestion  
2 ALERT type 5 Informative message, check

---

## Datablock: 4

---

Bond precision: C-C = 0.0081 A                      Wavelength=0.71073

Cell:                      a=9.3679(2)              b=13.6718(3)              c=17.3825(5)  
                            alpha=90              beta=95.555(1)              gamma=90

Temperature:              296 K

|                | Calculated          | Reported            |
|----------------|---------------------|---------------------|
| Volume         | 2215.83(9)          | 2215.83(9)          |
| Space group    | P 21/c              | P 21/c              |
| Hall group     | -P 2ybc             | -P 2ybc             |
| Moiety formula | C20 H18 Hg I2 N4 O2 | ?                   |
| Sum formula    | C20 H18 Hg I2 N4 O2 | C20 H18 Hg I2 N4 O2 |
| Mr             | 800.77              | 800.77              |
| Dx,g cm-3      | 2.400               | 2.400               |
| Z              | 4                   | 4                   |
| Mu (mm-1)      | 9.756               | 9.756               |
| F000           | 1472.0              | 1472.0              |
| F000'          | 1459.68             |                     |
| h,k,lmax       | 12,18,23            | 12,18,23            |
| Nref           | 5535                | 5516                |
| Tmin,Tmax      | 0.323,0.614         | 0.296,0.746         |
| Tmin'          | 0.019               |                     |

Correction method= # Reported T Limits: Tmin=0.296 Tmax=0.746  
AbsCorr = MULTI\_SCAN

Data completeness= 0.997                      Theta(max)= 28.336

R(reflections)= 0.0337( 4779)      wR2(reflections)= 0.0882( 5516)

S = 1.022      Npar= 262

---

The following ALERTS were generated. Each ALERT has the format

**test-name\_ALERT\_alert-type\_alert-level.**

Click on the hyperlinks for more details of the test.



#### Alert level C

|                   |                                                  |              |
|-------------------|--------------------------------------------------|--------------|
| PLAT342_ALERT_3_C | Low Bond Precision on C-C Bonds .....            | 0.00806 Ang. |
| PLAT420_ALERT_2_C | D-H Without Acceptor N3 --H3A .                  | Please Check |
| PLAT906_ALERT_3_C | Large K Value in the Analysis of Variance .....  | 2.271 Check  |
| PLAT971_ALERT_2_C | Check Calcd Resid. Dens. 0.76A From Hg           | 1.97 eA-3    |
| PLAT972_ALERT_2_C | Check Calcd Resid. Dens. 0.87A From Hg           | -1.65 eA-3   |
| PLAT978_ALERT_2_C | Number C-C Bonds with Positive Residual Density. | 0 Info       |

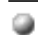

#### Alert level G

|                   |                                                  |             |
|-------------------|--------------------------------------------------|-------------|
| PLAT004_ALERT_5_G | Polymeric Structure Found with Maximum Dimension | 1 Info      |
| PLAT007_ALERT_5_G | Number of Unrefined Donor-H Atoms .....          | 2 Report    |
| PLAT083_ALERT_2_G | SHELXL Second Parameter in WGHT Unusually Large  | 10.32 Why ? |
| PLAT232_ALERT_2_G | Hirshfeld Test Diff (M-X) Hg --I1 .              | 9.0 s.u.    |
| PLAT912_ALERT_4_G | Missing # of FCF Reflections Above STh/L= 0.600  | 19 Note     |

---

0 **ALERT level A** = Most likely a serious problem - resolve or explain  
0 **ALERT level B** = A potentially serious problem, consider carefully  
6 **ALERT level C** = Check. Ensure it is not caused by an omission or oversight  
5 **ALERT level G** = General information/check it is not something unexpected

0 ALERT type 1 CIF construction/syntax error, inconsistent or missing data  
6 ALERT type 2 Indicator that the structure model may be wrong or deficient  
2 ALERT type 3 Indicator that the structure quality may be low  
1 ALERT type 4 Improvement, methodology, query or suggestion  
2 ALERT type 5 Informative message, check

---

It is advisable to attempt to resolve as many as possible of the alerts in all categories. Often the minor alerts point to easily fixed oversights, errors and omissions in your CIF or refinement strategy, so attention to these fine details can be worthwhile. In order to resolve some of the more serious problems it may be necessary to carry out additional measurements or structure refinements. However, the purpose of your study may justify the reported deviations and the more serious of these should normally be commented upon in the discussion or experimental section of a paper or in the "special\_details" fields of the CIF. checkCIF was carefully designed to identify outliers and unusual parameters, but every test has its limitations and alerts that are not important in a particular case may appear. Conversely, the absence of alerts does not guarantee there are no aspects of the results needing attention. It is up to the individual to critically assess their own results and, if necessary, seek expert advice.

### **Publication of your CIF in IUCr journals**

A basic structural check has been run on your CIF. These basic checks will be run on all CIFs submitted for publication in IUCr journals (*Acta Crystallographica*, *Journal of Applied Crystallography*, *Journal of Synchrotron Radiation*); however, if you intend to submit to *Acta Crystallographica Section C* or *E* or *IUCrData*, you should make sure that full publication checks are run on the final version of your CIF prior to submission.

### **Publication of your CIF in other journals**

Please refer to the *Notes for Authors* of the relevant journal for any special instructions relating to CIF submission.

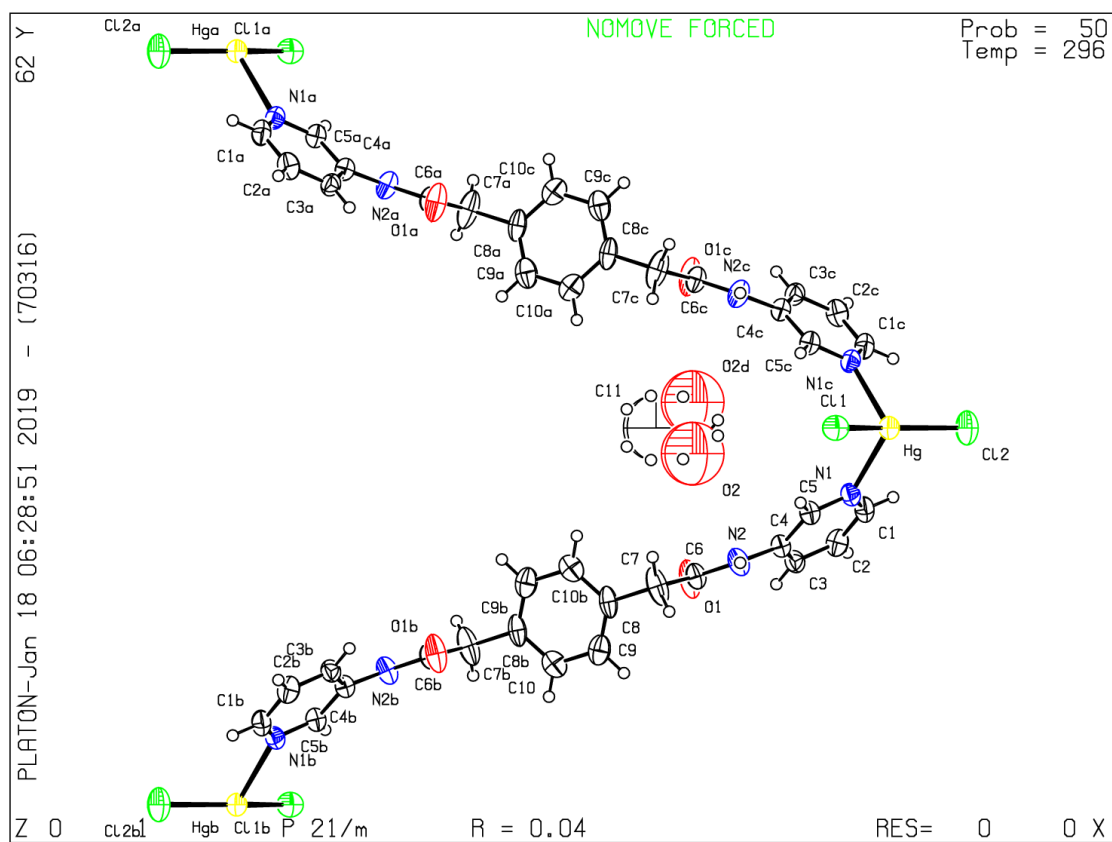



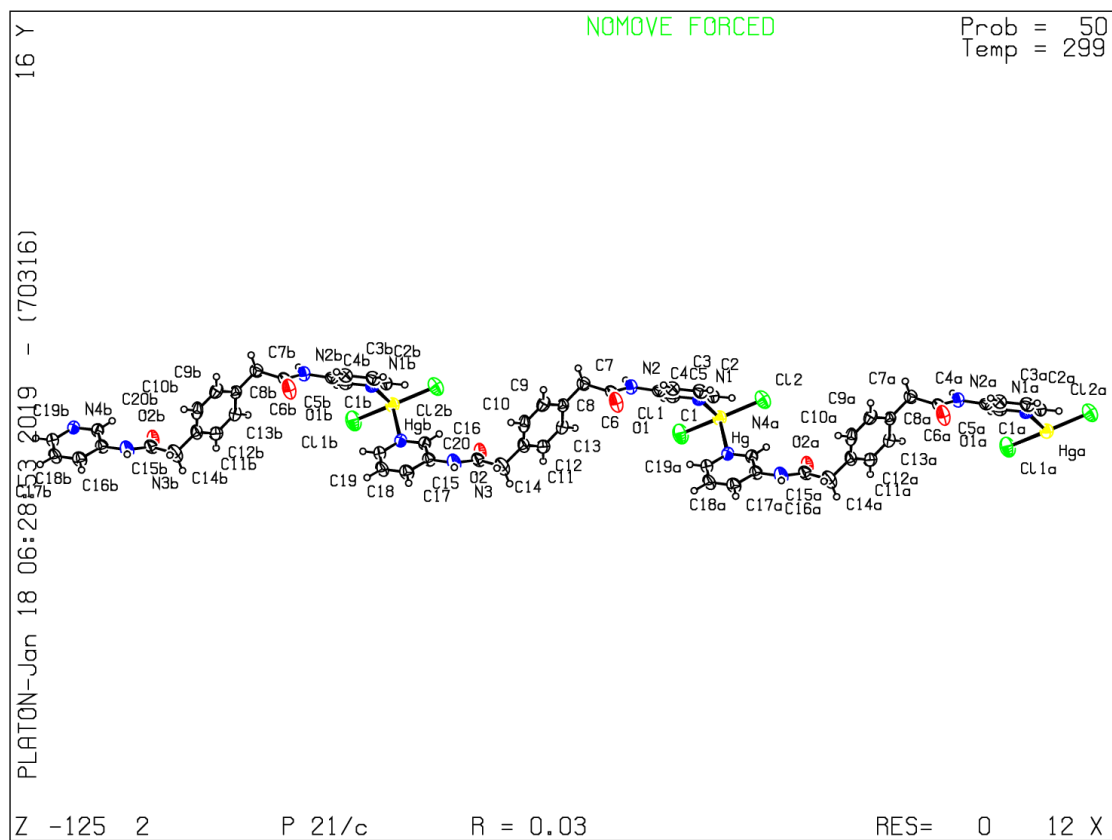

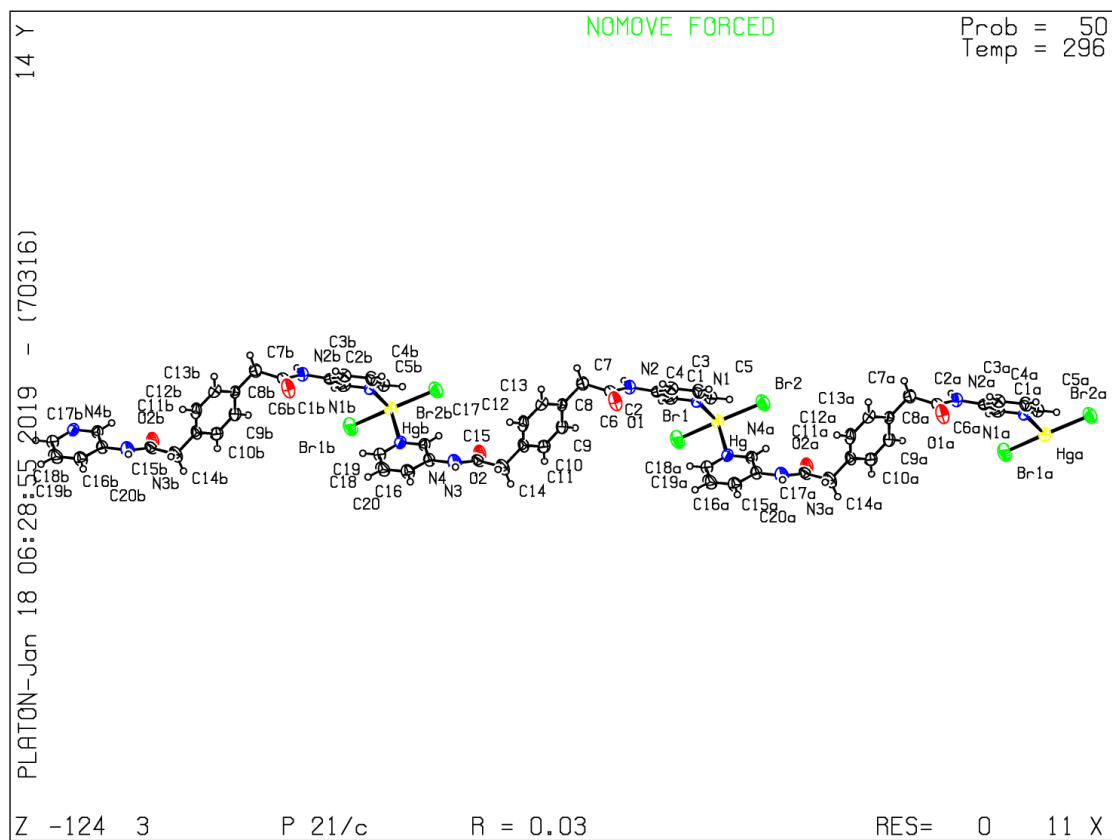

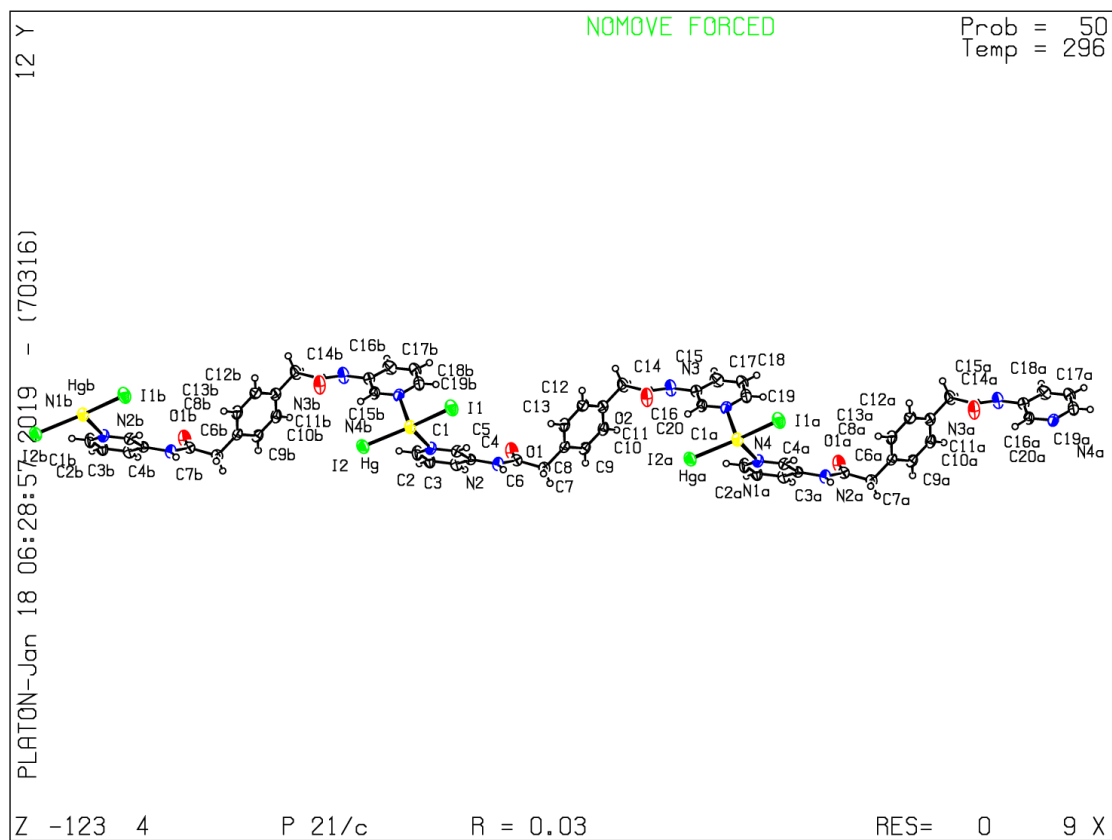

Supplement: s1 [file s1]
